# Supplementary material for: Development of nanocoral-like Cd(SSe) thin films using an arrested precipitation technique and their application
Source: Royal Society of Chemistry journal article supplement (doi:10.1039/c4nj01319k), 2014-01-01
Supplement: c4nj01319k1.pdf [file c4nj01319k1.pdf]

## **Electronic Supplementary Information (ESI) for New Journal of Chemistry.**

**DIO: 10.1039/c4nj01319k.**

### **Title: Development of nanocoral-like Cd(SSe) thin films via arrested precipitation technique and their application**

Kishorkumar V. Khot<sup>a</sup>, Sawanta S. Mali<sup>b</sup>, Nita B. Pawar<sup>a</sup>, Rohini R. Kharade<sup>a</sup>,  
Rahul M. Mane<sup>a</sup>, Vijay V. Kondalkar<sup>a</sup>, Pallavi B. Patil<sup>a</sup>, Pramod S. Patil<sup>c</sup>,  
Chang K. Hong<sup>b</sup>, Jin H. Kim<sup>d</sup>, Jaeyeong Heo<sup>e</sup>, and Popatrao N. Bhosale\*<sup>a</sup>.

<sup>a</sup>*Materials Research Laboratory, Department of Chemistry, Shivaji University, Kolhapur, India.*

<sup>b</sup>*Polymer Energy Materials Laboratory, Advanced Chemical Engineering Department,  
Chonnam National University, Gwangju, South Korea*

<sup>c</sup>*Thin film Materials Laboratory, Department of Physics, Shivaji University, Kolhapur, India.*

<sup>d</sup>*Photonic and Electronic Thin Film Laboratory, Department of Materials Science and Engineering,  
Chonnam National University, Gwangju, South Korea.*

<sup>e</sup>*Department of Materials Science and Engineering and Optoelectronics Convergence Research Center,  
Chonnam National University, Gwangju, South Korea.*

#### **Corresponding Author: Prof. (Dr.) P. N. Bhosale,**

*Materials Research Laboratory,*

*Department of Chemistry,*

*Shivaji University, Kolhapur, MS-India.*

*E-mail address: **p\_n\_bhosale@rediffmail.com***

*Tel Number: 091-231-2609338,*

*Fax: +91-231-2691533, 2692333 (O).*

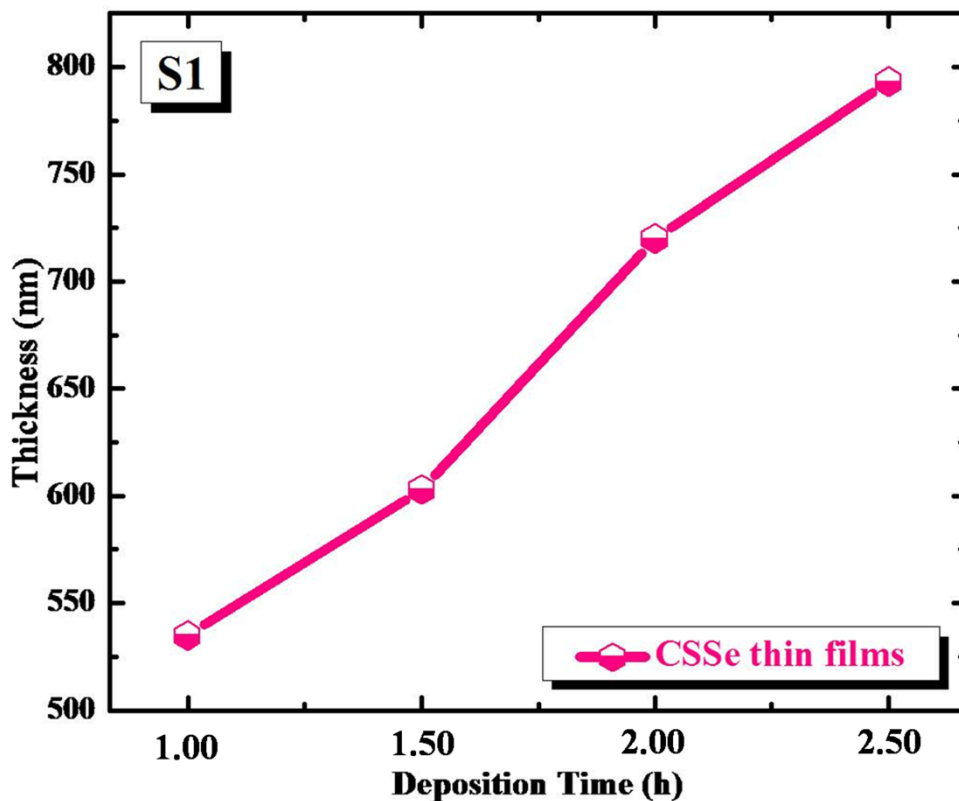

**Fig. S1:** Plot of variation of thickness as function of deposition time from 1.00 to 2.50h.

Thickness of as-deposited thin films increases from 535 to 793 nm with increase in deposition time and values are summarized in Table 2 (main manuscript). Variation of thickness as function of deposition time (1.00 to 2.50 h) is exposed in Fig.S1. The growth rate appreciably increases, which is up to optimized 2.50 h deposition time. This cause behind that, plentiful amounts of available  $\text{Cd}^{2+}$ ,  $\text{S}^{2-}$ , and  $\text{Se}^{2-}$  metal ions released from bound complex state with increasing deposition time which reflects to privileged growth and thickness of thin films. At higher growth rate more metal ions goes on continuous depletion process and all metal ions are vanished from deposition solution.<sup>1</sup>

#### Reference

- 1 K. L. Choy, *Prog. Mater. Sci.*, 2003, **48**, 57.
